# Supplementary material for: Quality of Tenebrio molitor Powders: Effects of Four Processes on Microbiological Quality and Physicochemical Factors
Source: MDPI journal article supplement (doi:10.3390/foods12030572), 2023-01-28
Supplement: s1 [file s1]

**Appendix A:**  
**Supplementary Materials**

**Table 1.** Microbial counts of fresh *T. molitor* larvae in log CFU/g.

| Sample | Batch | Total aerobic count (TAC) | Bacterial endospores | Lactic acid bacteria(LAB ) | <i>Enterobacteriaceae</i> | Yeasts and molds | Yeast | Molds |
|--------|-------|---------------------------|----------------------|----------------------------|---------------------------|------------------|-------|-------|
| A      | 1     | 8.5±0.0                   | 5.3±0.0              | 8.1±0.0                    | /                         | 4.2              | 3.9*  | 3.9*  |
|        | 2     | 8.3±0.0                   | 3.5±0.1              | 7.9±0.1                    | >4.2                      | 3.8*             | 2.3   | 3.8*  |
|        | Mean  | 8.4±0.0                   | 5.0±0.0              | 8.0±0.1                    | >4.2                      | 4.0              | 3.1   | 3.8   |
| AR     | 1     | 8.4±0.0                   | 4.1±0.1              | 8.0±0.1                    | /                         | /                | /     | 4.0*  |
|        | 2     | 8.5±0.0                   | 3.6±0.1              | 7.9±0.1                    | /                         | /                | /     | 4.0*  |
|        | Mean  | 8.4±0.0                   | 3.9±0.1              | 7.9±0.1                    | /                         | /                | /     | 4.0   |

\* Calculation performed on one dilution; / Not tested

**Table 2.** Microbial hazards detection of fresh *T. molitor* larvae in log CFU/g.

| Sample | Batch | <i>E.coli</i> | Sulfite-reducing anaerobes | Coagulase-positive <i>staphylococci</i> | <i>Bacillus cereus</i> | <i>Clostridium perfringens</i> | <i>Listeria monocytogenes</i> | <i>Salmonella</i> spp. | <i>Cronobacter sakazakii</i> |
|--------|-------|---------------|----------------------------|-----------------------------------------|------------------------|--------------------------------|-------------------------------|------------------------|------------------------------|
| A      | 1     | <1.0          | 1.0**                      | <2.0                                    | <1.0                   | <1.0                           | ND                            | ND                     | ND                           |
|        | 2     | <1.0          | <1.0                       | <2.0                                    | <1.0                   | <1.0                           | ND                            | ND                     | ND                           |
|        | Mean  | <1.0          | <1.0                       | <2.0                                    | <1.0                   | <1.0                           | ND                            | ND                     | ND                           |

\*\* Estimated number; ND not detected

**Table 3.** Microbial counts of *T. molitor* powder in log CFU/g.

| Sample | Batch | Total aerobic count (TAC) | Bacterial endospores | Lactic acid bacteria (LAB) | <i>Enterobacteriaceae</i> | Yeasts and molds | Yeast | Molds |
|--------|-------|---------------------------|----------------------|----------------------------|---------------------------|------------------|-------|-------|
| PA-P   | 1     | 5.6±0.1                   | 2.5±0.1              | 3.9±0.1                    | 3.6*                      | 3.4*             | 3.4*  | 1.5** |
|        | 2     | 4.6±0.1                   | 2.2±0.1              | 3.2±0.0                    | 2.0**                     | <1.0             | <1.0  | <1.0  |
|        | Mean  | 5.3±0.1                   | 2.4±0.1              | 3.7±0.1                    | 2.8                       | <2.2             | <2.2  | <2.2  |
| PB-P   | 1     | 4.4±0.0                   | 2.3±0.1              | 2.0±0.2*                   | <1.0                      | <1.0             | <1.0  | <1.0  |
|        | 2     | 4.9±0.1                   | 2.2±0.1              | 3.2±0.0                    | 2.8                       | <1.0             | <1.0  | <1.0  |
|        | Mean  | 4.7±0.1                   | 2.2±0.1              | 3.0±0.0                    | <1.9                      | <1.0             | <1.0  | <1.0  |
| PC-P   | 1     | 5.5±0.1*                  | 2.6±0.1              | 5.1±0.1                    | 3.4*                      | <1.6             | <1.0  | 1.5** |
|        | 2     | 5.5±0.1*                  | 2.4±0.1              | 3.8±0.1                    | 3.2                       | 2.1              | 2.1   | 1.0** |
|        | Mean  | 5.5±0.1                   | 2.5±0.1              | 4.8±0.1                    | 3.3                       | <1.9             | <1.6  | 1.3   |
| PD-P   | 1     | 8.5±0.0                   | 5.2±0.0              | 7.8±0.1                    | >4.2                      | 2.6              | 2.0** | 2.5   |
|        | 2     | 8.8±0.1                   | 4.4±0.0              | 8.3±0.0                    | >4.2                      | 2.9              | 2.5   | 2.7   |
|        | Mean  | 8.6±0.1                   | 4.9±0.0              | 8.1±0.0                    | >4.2                      | 2.8              | 2.3   | 2.6   |

\* Calculation performed on one dilution; \*\* Estimated number

**Table 4.** Microbial hazards detection of *T. molitor* powder in log CFU/g.

| Sample | Batch | <i>E.coli</i> | Sulfite-reducing anaerobes | Coagulase-positive staphylococci | <i>Bacillus cereus</i> | <i>Clostridium perfringens</i> | <i>Listeria monocytogenes</i> | <i>Salmonella</i> spp. | <i>Cronobacter sakazakii</i> |
|--------|-------|---------------|----------------------------|----------------------------------|------------------------|--------------------------------|-------------------------------|------------------------|------------------------------|
| PA-P   | 1     | <1.0          | <1.0                       | <2.0                             | <1.0                   | <1.0                           | /                             | /                      | /                            |
|        | 2     | <1.0          | <1.0                       | <2.0                             | <1.0                   | <1.0                           | /                             | /                      | /                            |
|        | Mean  | <1.0          | <1.0                       | <2.0                             | <1.0                   | <1.0                           | /                             | /                      | /                            |
| PB-P   | 1     | <1.0          | <1.0                       | <2.0                             | <1.0                   | <1.0                           | /                             | /                      | /                            |
|        | 2     | <1.0          | <1.0                       | <2.0                             | <1.0                   | <1.0                           | /                             | /                      | /                            |
|        | Mean  | <1.0          | <1.0                       | <2.0                             | <1.0                   | <1.0                           | /                             | /                      | /                            |
| PC-P   | 1     | <1.0          | <1.0                       | <2.0                             | <1.0                   | <1.0                           | /                             | /                      | /                            |
|        | 2     | <1.0          | <1.0                       | <2.0                             | <1.0                   | <1.0                           | /                             | /                      | /                            |
|        | Mean  | <1.0          | <1.0                       | <2.0                             | <1.0                   | <1.0                           | /                             | /                      | /                            |
| PD-P   | 1     | <1.0          | <1.0                       | <2.0                             | <1.0                   | <1.0                           | /                             | /                      | /                            |
|        | 2     | <1.0          | <1.0                       | <2.0                             | <1.0                   | <1.0                           | /                             | /                      | /                            |
|        | Mean  | <1.0          | <1.0                       | <2.0                             | <1.0                   | <1.0                           | /                             | /                      | /                            |

/ Not tested

**Table 5.** Log reduction of significant hazards estimated with D<sub>ref</sub>-values for two heat treatments.

| Log reduction   | <i>B. Cereus</i> (spore) | <i>C. botulinum</i> group I (spore) | <i>C. perfringens</i> (spore) | <i>Cronobacter</i> spp. | <i>E. coli</i> STEC | <i>L. monocytogenes</i> | <i>S. aureus</i> | <i>Salmonella</i> spp. | <i>S. aureus</i> enterotoxin |
|-----------------|--------------------------|-------------------------------------|-------------------------------|-------------------------|---------------------|-------------------------|------------------|------------------------|------------------------------|
| 100°C for 5 min | 6.28                     | 0.18                                | 0.12                          | 15789721.53*            | 863245.78*          | 3799.78*                | 258973.73*       | 1187585.56*            | 0.03                         |
| 80°C for 30 min | 0.95                     | 0.01                                | 0.02                          | 25415.41*               | 1199.48*            | 346.52*                 | 2159.06*         | 5968.88*               | 0.05                         |

\* Replaced by >12 in Figure
